# Supplementary material
Source: PubMed Central journal article supplement (PMC1315408)
Supplement: genesdev_19_24_3055__1.pdf [file genesdev_19_24_3055__1.pdf]

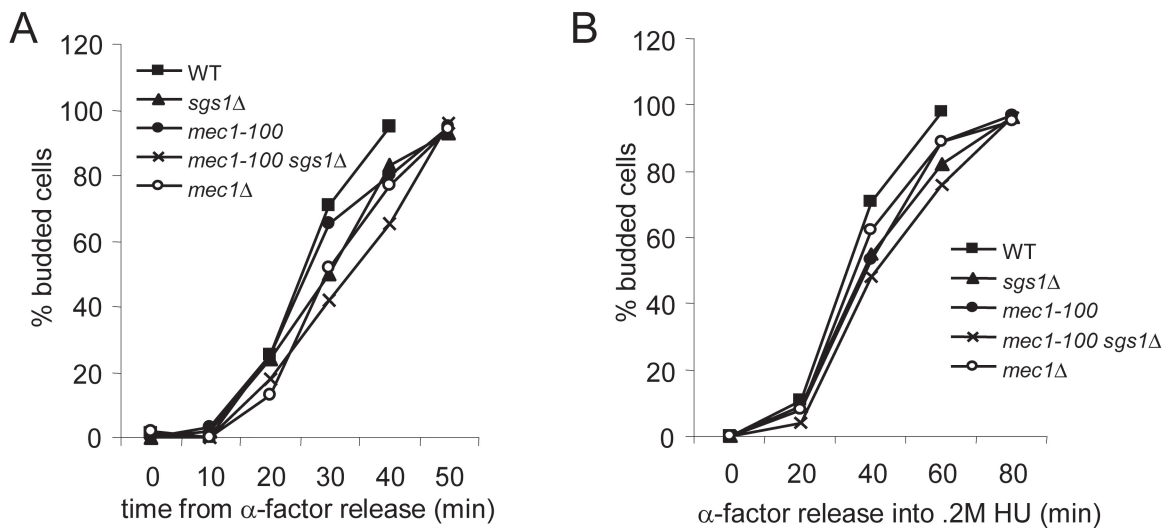

Bud emergence was scored on 100 cells from each culture, which was released from  $\alpha$ -factor block into either **A**. YPAD or **B**. 0.2M HU for wild-type (GA-180), *sgs1* $\Delta$  (GA-1761), *mec1-100* (GA-2474), *mec1-100 sgs1* $\Delta$  (GA-2514), and *mec1* $\Delta$  *sml1* $\Delta$  (GA-2895). The *sml1* $\Delta$  mutation alone also had no effect.
