# Supplementary material
Source: PubMed Central journal article supplement (PMC1315408)
Supplement: genesdev_19_24_3055__4.pdf [file genesdev_19_24_3055__4.pdf]

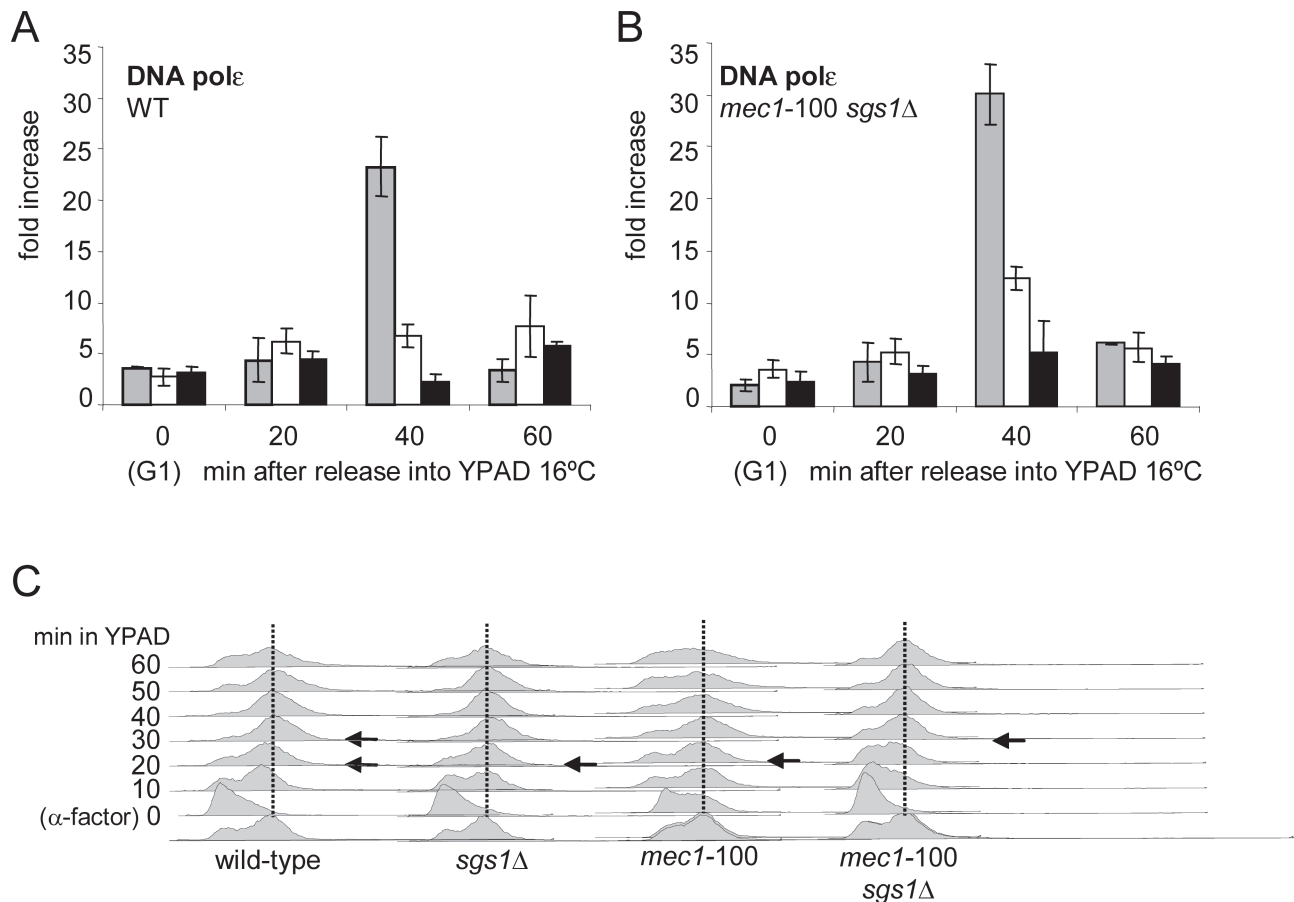

ChIP on Myc-tagged DNA pol  $\epsilon$  as described in Figure 3 was performed on cultures synchronised in G1 with  $\alpha$ -factor and released into YPAD at 16°C prior to fixation with 1% formaldehyde at the indicated times for the following strains: **A.** Wild-type (GA-2448) and **B.** the isogenic *mec1-100 sgs1 $\Delta$*  (GA-2516) **C.** FACS analysis during S-phase progression in the absence of damage after release from  $\alpha$ -factor block for wild-type (GA-180), *sgs1 $\Delta$*  (GA-1761), *mec1-100* (GA-2474), *mec1-100 sgs1 $\Delta$*  (GA-2514).
