# Supplementary material
Source: PubMed Central journal article supplement (PMC1315408)
Supplement: genesdev_19_24_3055__5.pdf [file genesdev_19_24_3055__5.pdf]

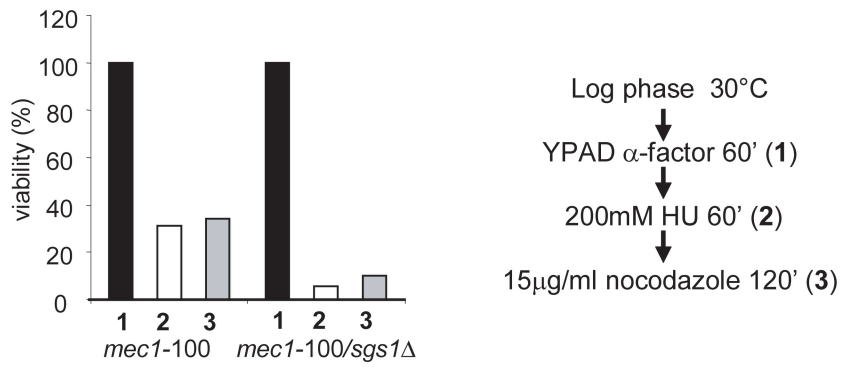

Viability monitored as colony outgrowth on YPAD was measured for *mec1-100* (GA-2474) and *mec1-100 sgs1Δ* (GA-2514) cells that were synchronized in  $\alpha$ -factor for 60 min (black column), then treated with 0.2 M HU for 60 min (striped column). The third sample was taken after release into 15mg/ml nocodazole for 2 hours (grey column).

Supplemental Figure 5
