# Supplementary material
Source: PubMed Central journal article supplement (PMC1315408)
Supplement: genesdev_19_24_3055__6.pdf [file genesdev_19_24_3055__6.pdf]

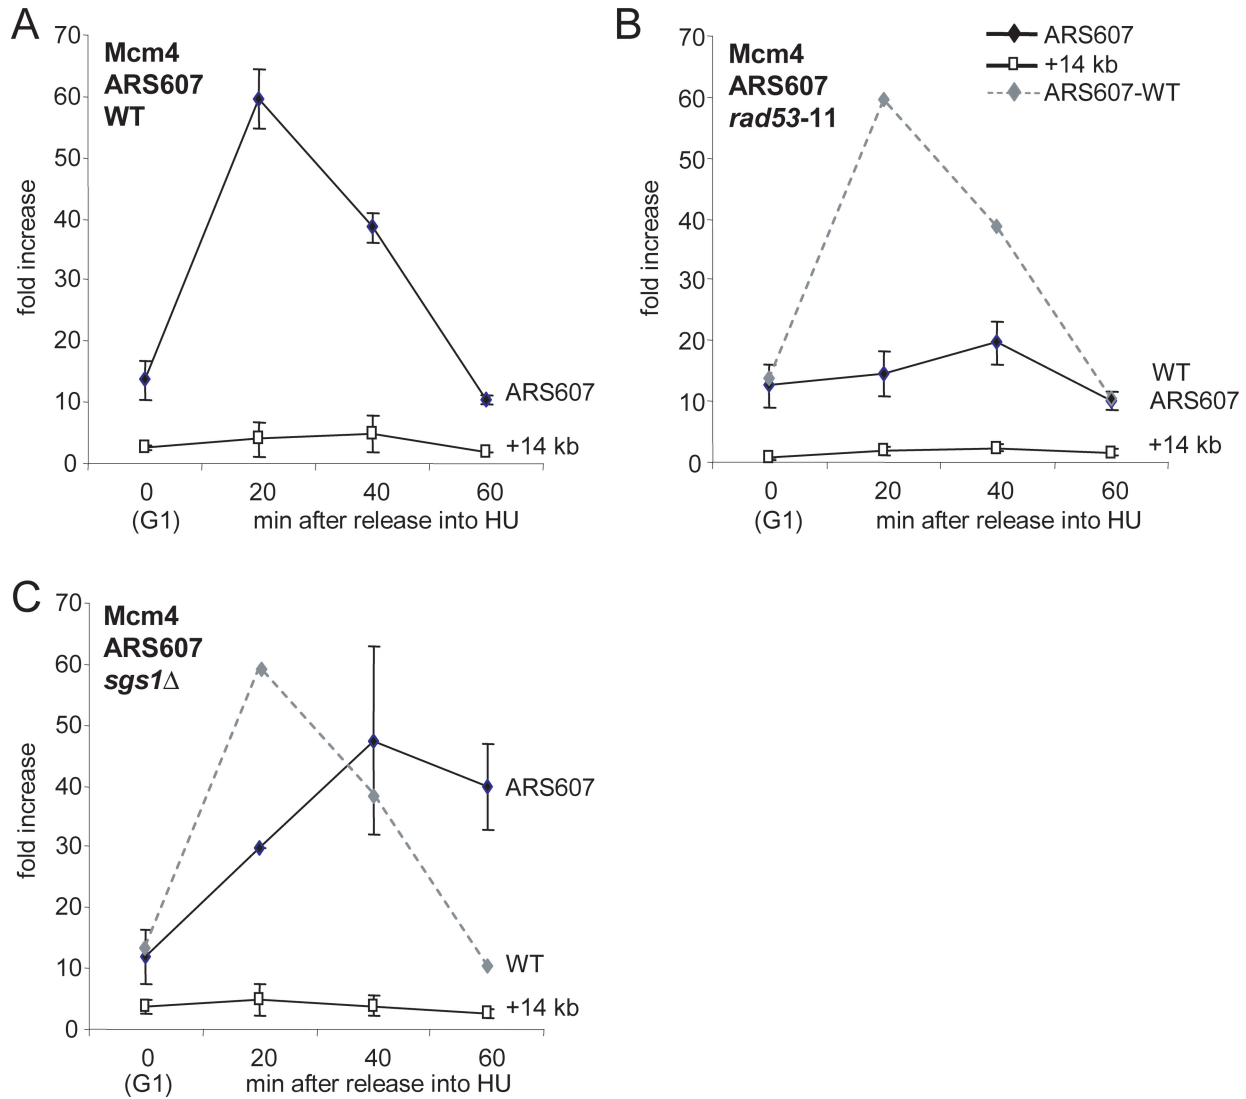

ChIP was performed for Myc-tagged Mcm4 (diamonds) in cultures released from  $\alpha$ -factor into 0.2 M HU as in Figure 4, using **A.** wild-type (GA-1039), **B.** *rad53-11* (GA-3060), and **C.** *sgs1Δ* (GA-3061). Real-time PCR was performed as described for ARS607 (filled symbols) and +14kb (open symbols). Wild-type signals are shown in light gray dashed lines for comparison.
